# Supplementary material for: Structural Exploration on Palmitoyltransferase DHHC3 from Homo sapiens
Source: MDPI journal article supplement (doi:10.3390/polym14153013), 2022-07-26
Supplement: s1 [file s1]

Article

# Structural exploration on palmitoyltransferase DHHC3 from *Homo sapiens*

Meng Tang <sup>1,2</sup>, Ying Xia <sup>3,4</sup>, Taoran Xiao <sup>1,2</sup>, Ruiyu Cao <sup>1,2</sup>, Yu Cao <sup>3,4,\*</sup> and Bo OuYang <sup>1,2,\*</sup>

- <sup>1</sup> State Key Laboratory of Molecular Biology, Centre for Excellence in Molecular Cell Science, Shanghai Institute of Biochemistry and Cell Biology, Chinese Academy of Sciences, 320 Yueyang Road, Shanghai 200031, China; tangmeng6@sibcb.ac.cn (M.T.); xiaotaoran2018@sibcb.ac.cn (T.X.); caoruiyu2018@sibcb.ac.cn (R.C.)
  - <sup>2</sup> University of Chinese Academy of Sciences, Beijing 100049, China
  - <sup>3</sup> Institute of Precision Medicine, The Ninth People's Hospital, Shanghai Jiao Tong University School of Medicine, 115 Jinzun Road, Shanghai 200125, China; xiaying@shsmu.edu.cn (Y.X.)
  - <sup>4</sup> Department of Orthopaedics, Shanghai Key Laboratory of Orthopaedic Implant, Shanghai Ninth People's Hospital, Shanghai Jiao Tong University School of Medicine, Shanghai 200011, China
- \* Correspondence: yu.cao@shsmu.edu.cn (Y.C.); ouyang@sibcb.ac.cn (B.O.)

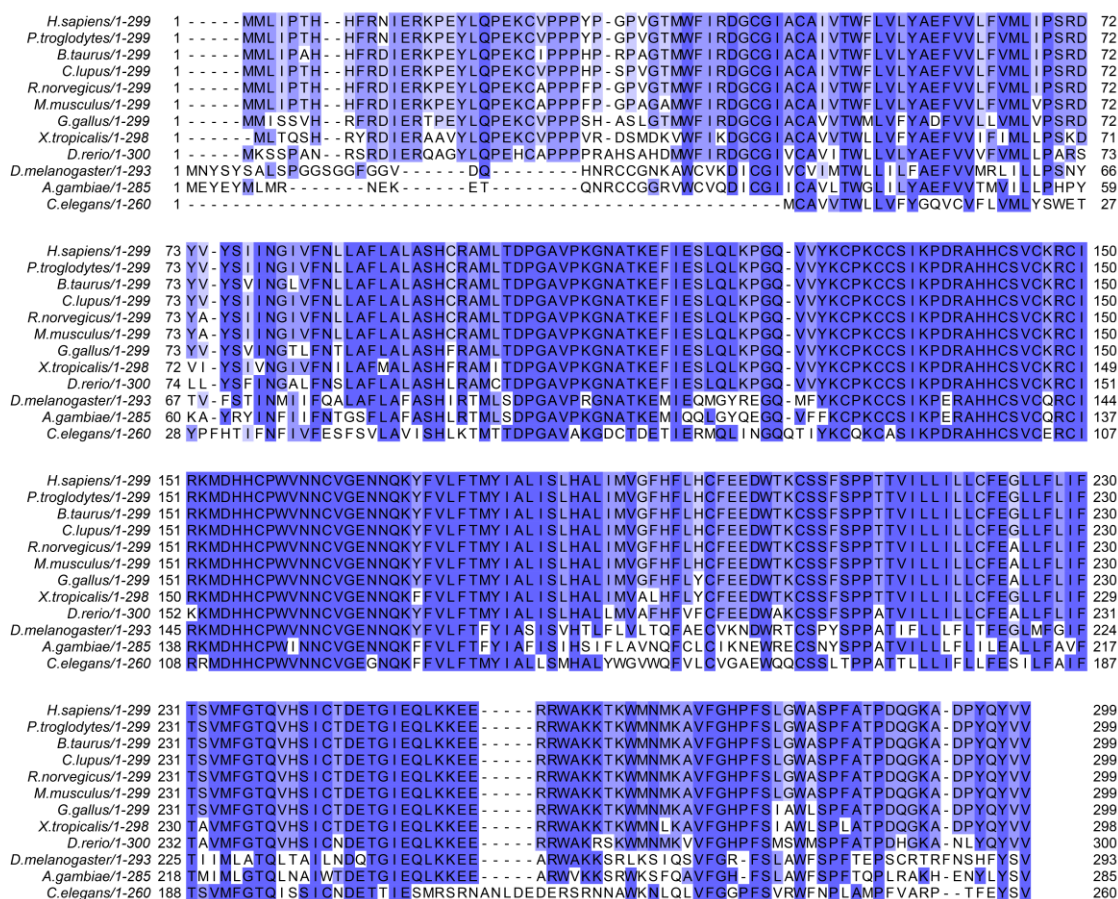

**Figure S1.** Sequence alignment of DHHC3 homologs. Amino acid sequences of DHHC3 homologs were aligned by Clustal Omega [37]. Species contain *Homo sapiens* (human), *Pan troglodytes* (chimpanzee), *Bos taurus* (bovine), *Canis lupus* (wolf), *Rattus norvegicus* (rat), *Mus musculus* (mouse), *Gallus gallus* (Chicken), *Xenopus tropicalis* (clawed frog), *Danio rerio* (zebrafish), *Drosophila melanogaster* (fruit fly), *Anopheles gambiae* (mosquito), *Caenorhabditis elegans*.

**Table S1.** Sequence identity matrix of mammalian DHHC3

|                          | <i>H. sapiens</i> | <i>P. troglodytes</i> | <i>C. lupus</i> | <i>R. norvegicus</i> | <i>M. musculus</i> | <i>B. taurus</i> |
|--------------------------|-------------------|-----------------------|-----------------|----------------------|--------------------|------------------|
| <i>Homo sapiens</i>      | 100               | 100                   | 99              | 98.33                | 97.32              | 97.32            |
| <i>Pan troglodytes</i>   | 100               | 100                   | 99              | 98.33                | 97.32              | 97.32            |
| <i>Canis lupus</i>       | 99                | 99                    | 100             | 98.33                | 97.32              | 97.99            |
| <i>Rattus norvegicus</i> | 98.33             | 98.33                 | 98.33           | 100                  | 99                 | 96.99            |
| <i>Mus musculus</i>      | 97.32             | 97.32                 | 97.32           | 99                   | 100                | 96.66            |
| <i>Bos taurus</i>        | 97.32             | 97.32                 | 97.99           | 96.99                | 96.66              | 100              |

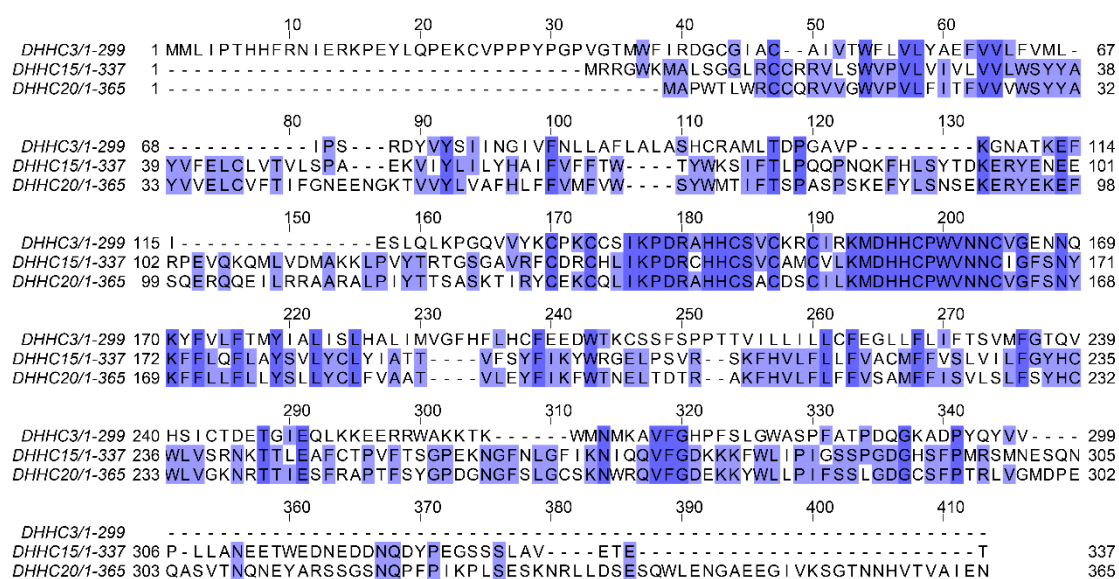

**Figure S2.** Sequence alignment of DHHC3, DHHC15 and DHHC20. Amino acid sequences of human DHHC3, DHHC15 and DHHC20 were aligned by Clustal Omega [37]. DHHC3 shows low sequence identity with DHHC15 (25.4 %) and DHHC20 (29.5 %), while CRD including DHHC motif is highly conserved in these 3 members.

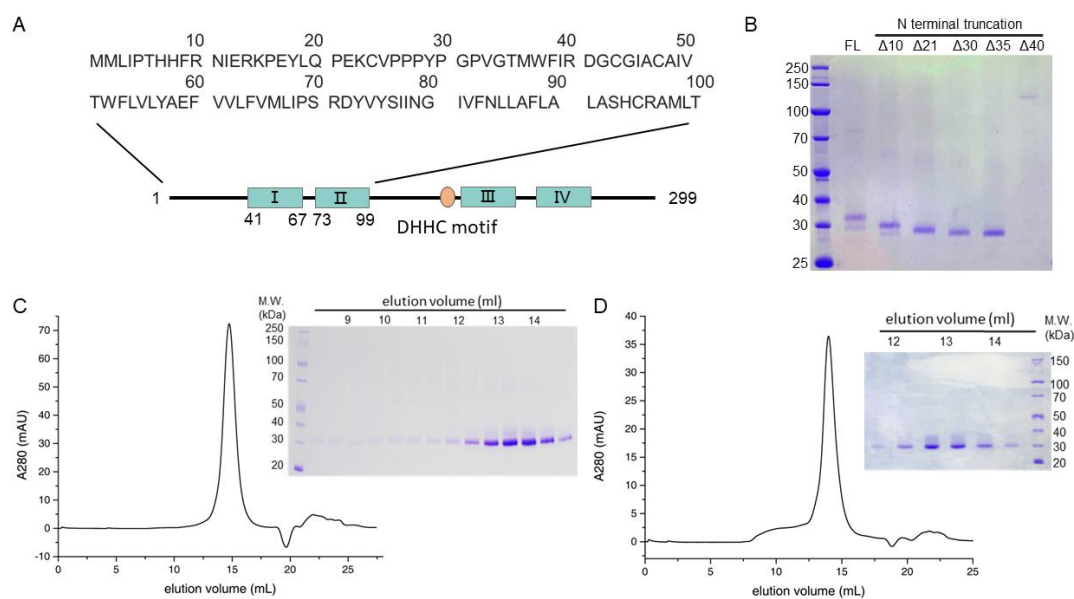

**Figure S3.** Expression and purification of truncated hDHH3s. (A) Topological scheme and N-terminal sequence of hDHH3. (B) Expression test of hDHH3 with different N-terminal truncations. (C) Size exclusion chromatography and SDS-PAGE of hDHH3-Δ21 and (D) hDHH3-Δ35.

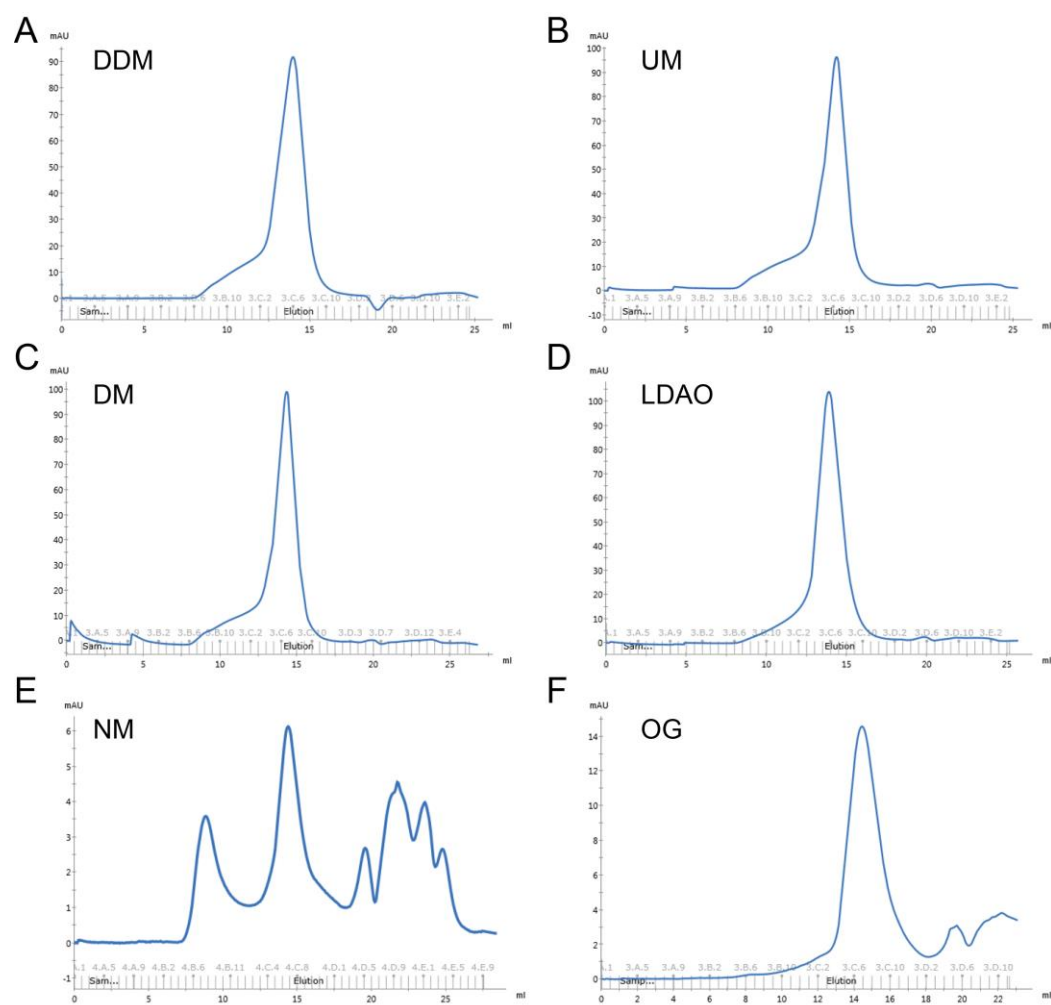

**Figure S4.** Detergent screening of hDHHC3-Δ21. Size exclusion chromatography profiles of hDHHC3-Δ21 in FPLC buffer containing 25 mM HEPES, 150 mM NaCl with (A) 1 mM DDM, (B) 2 mM UM, (C) 4 mM DM, (D) 0.15 % LDAO, (E) 12 mM NM and (F) 40 mM OG, respectively.

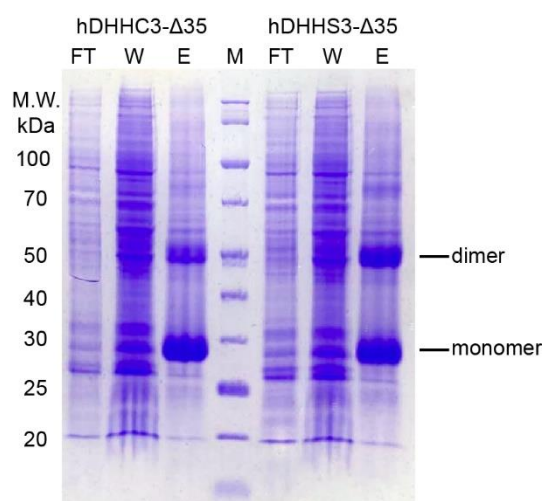

**Figure S5.** Dimerization of hDHHC3-Δ35 and hDHHS3-Δ35. An obvious dimeric band of hDHHS3-Δ35 was observed on the SDS-PAGE gel.

## Reference

37. Madeira, F.; Pearce, M.; Tivey, A.R.N.; Basutkar, P.; Lee, J.; Edbali, O.; Madhusoodanan, N.; Kolesnikov, A.; Lopez, R. Search and sequence analysis tools services from EMBL-EBI in 2022. *Nucleic Acids Res.* **2022**, doi:10.1093/nar/gkac240.
